# Supplementary material
Source: Springer Nature journal article supplement (https://www.springermedizin.de/resource/supplementary/12884_2007_121_MOESM2_ESM.pdf/9459668)

(a)

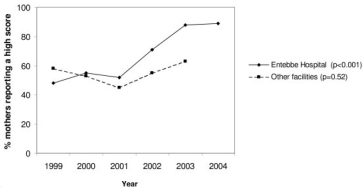

(b)

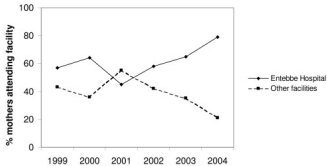

Supplement: MOESM2 [file 9459668]
